# Supplementary material for: Cholesterol Efflux Capacity and Cardiovascular Disease: The Ludwigshafen Risk and Cardiovascular Health (LURIC) Study
Source: PubMed Central journal article supplement (PMC7700479; doi:10.3390/biomedicines8110524), 2020-11-21
Supplement: biomedicines-08-00524-s001.pdf [file biomedicines-08-00524-s001.pdf]

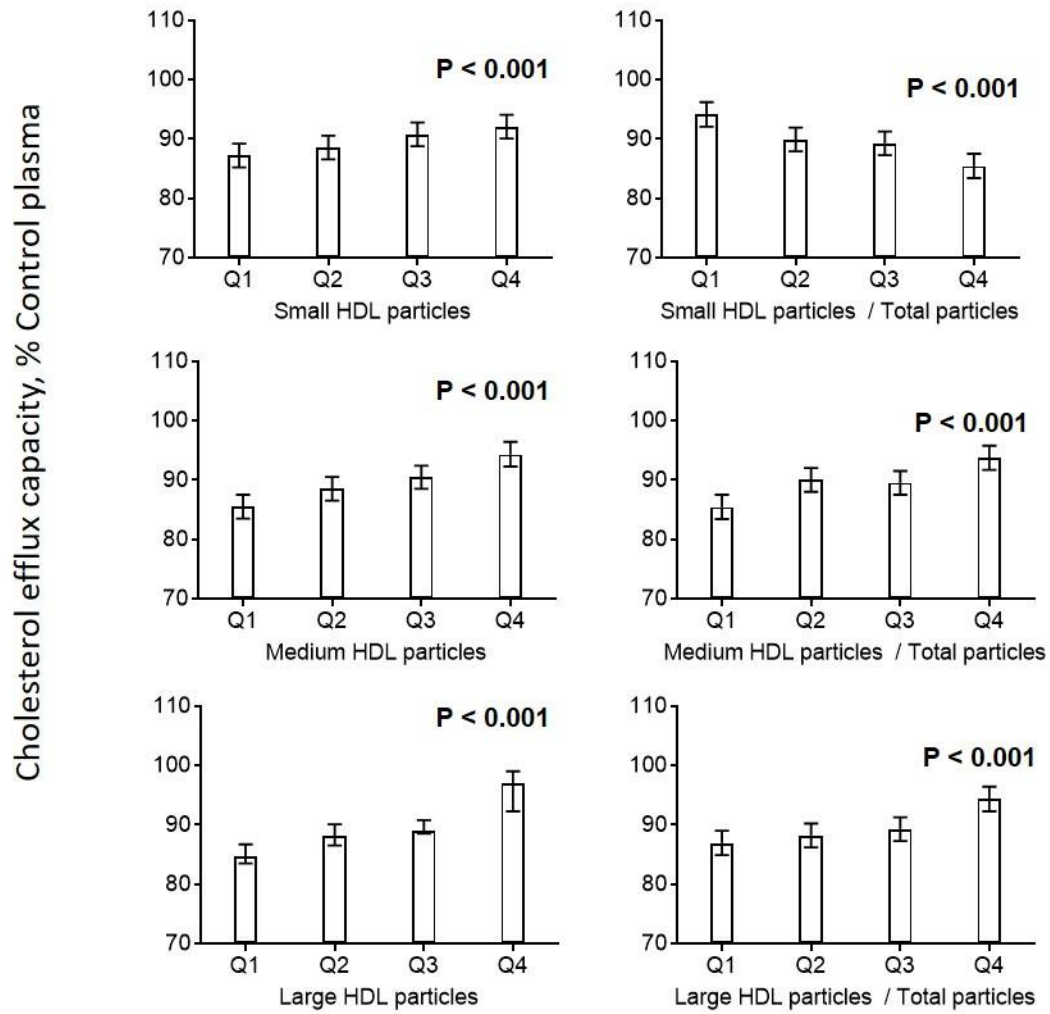

**Supplemental figure 1.** Association of absolute (left panel) and relative (right panel) HDL particle concentration with cholesterol efflux. Diagrams are showing estimated marginal means and 95% confidence intervals obtained in a general; linear model, adjusted for the use of statins, age, CAD, diabetes mellitus, smoking, LDL cholesterol, HDL cholesterol and triglycerides. Age, LDL-cholesterol, HDL-cholesterol and triglycerides (log transformed) were included as continuous rather than categorical covariables. p values are given for comparison with the first category of each variable.

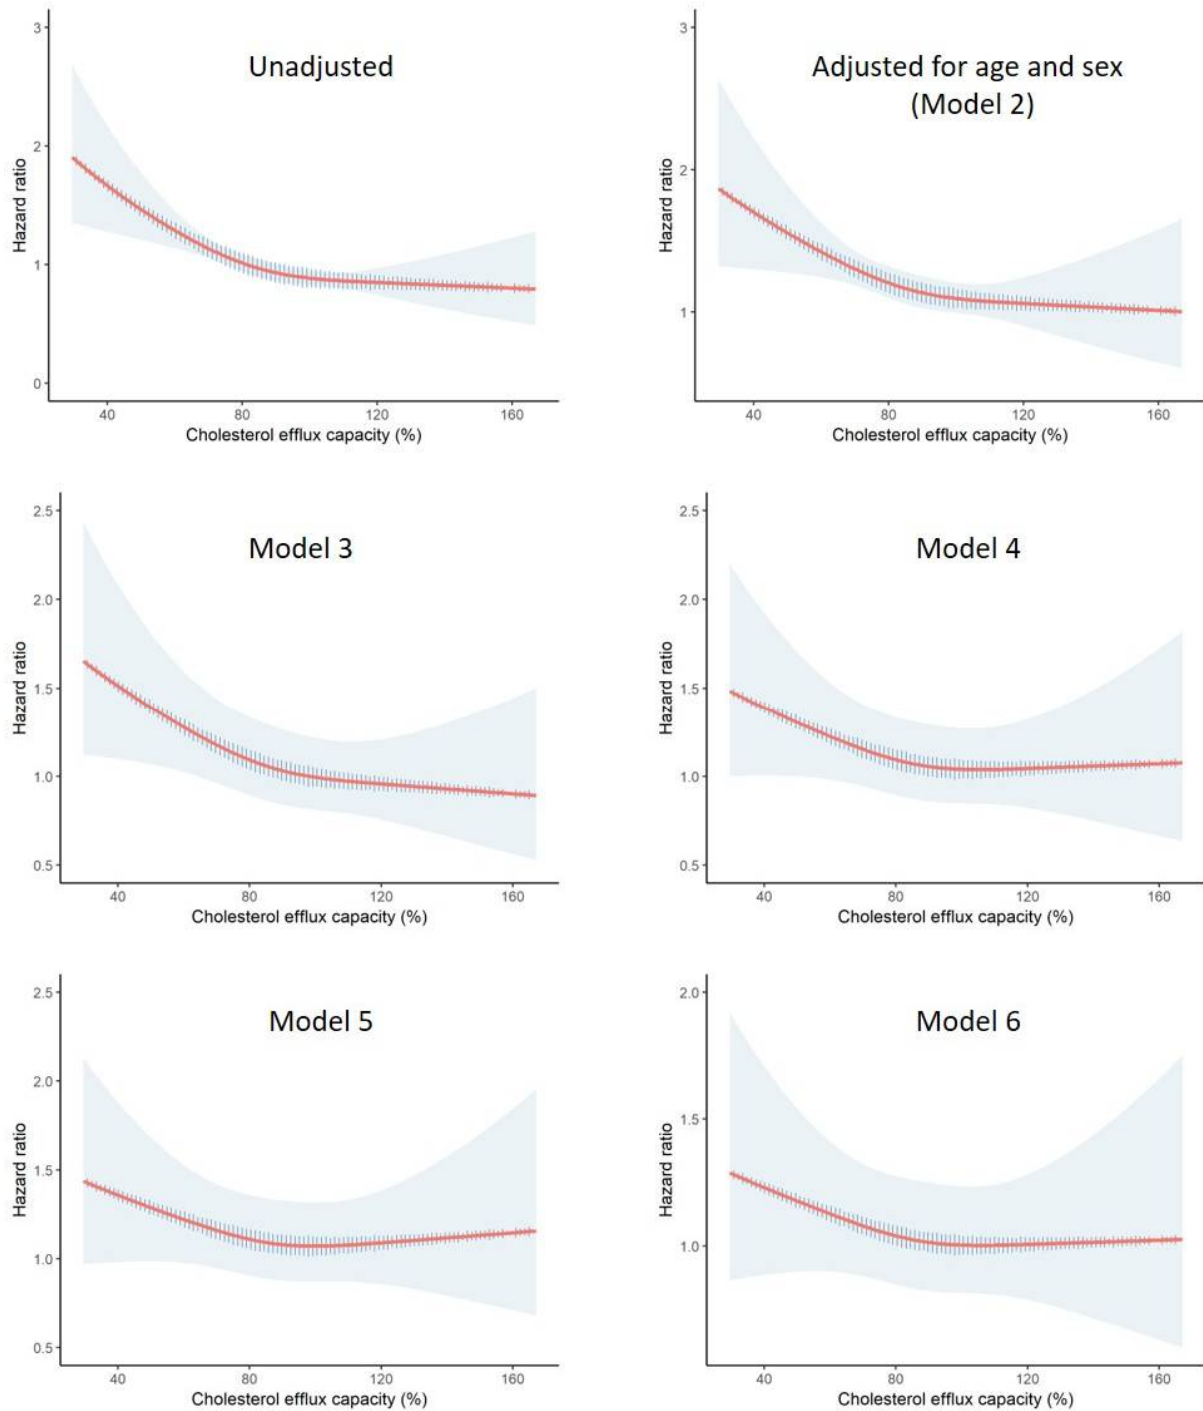

**Supplemental figure 2.** Spline curves showing hazard ratios for cardiovascular death according to cholesterol efflux capacity in the whole study population (n = 2468). Calculations were repeated with following models of adjustment: Model 1: not adjusted. Model 2: adjusted for age and gender. Model 3: adjusted for age, gender, use of statins, CAD, diabetes mellitus, smoking, triglycerides and LDL-cholesterol. Model 4: adjusted for age, gender, use of statins, CAD, diabetes mellitus, smoking, triglycerides, LDLcholesterol and HDL-cholesterol. Model 5: adjusted for age, gender, use of statins, CAD, diabetes mellitus, smoking, triglycerides, LDLcholesterol, HDL-cholesterol, apolipoprotein AI, apolipoprotein AII, HDL-C'. Model 6: adjusted for age, gender, use of statins, CAD, diabetes mellitus, smoking, triglycerides, LDLcholesterol, HDL-cholesterol, adiponectin, fibrinogen, C-reactive protein.

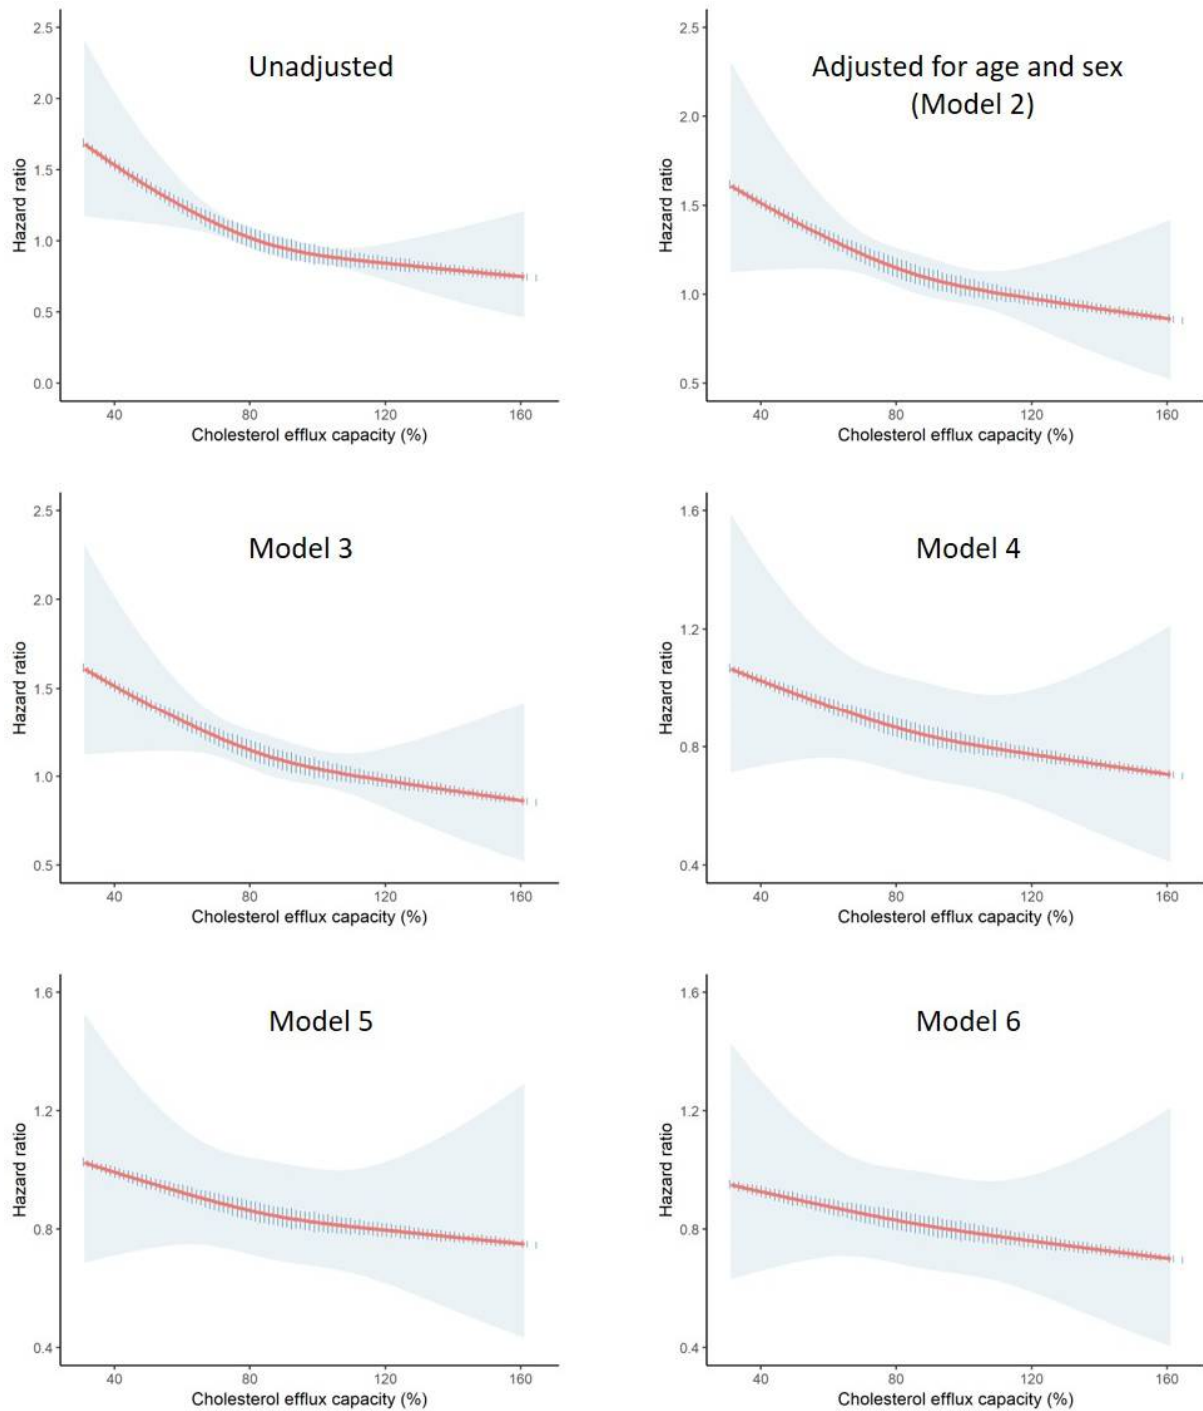

**Supplementary figure 3.** Spline curves showing hazard ratios for cardiovascular death according to cholesterol efflux capacity in CAD patients (n = 1886). Calculations were repeated with following models of adjustment: Model 1: not adjusted. Model 2: adjusted for age and gender. Model 3: adjusted for age, gender, use of statins, CAD, diabetes mellitus, smoking, triglycerides and LDL-cholesterol. Model 4: adjusted for age, gender, use of statins, CAD, diabetes mellitus, smoking, triglycerides, LDLcholesterol and HDL-cholesterol. Model 5: adjusted for age, gender, use of statins, CAD, diabetes mellitus, smoking, triglycerides, LDLcholesterol, HDL-cholesterol, apolipoprotein AI, apolipoprotein AII, HDL-C'. Model 6: adjusted for age, gender, use of statins, CAD, diabetes mellitus, smoking, triglycerides, LDLcholesterol, HDL-cholesterol, adiponectin, fibrinogen, C-reactive protein.

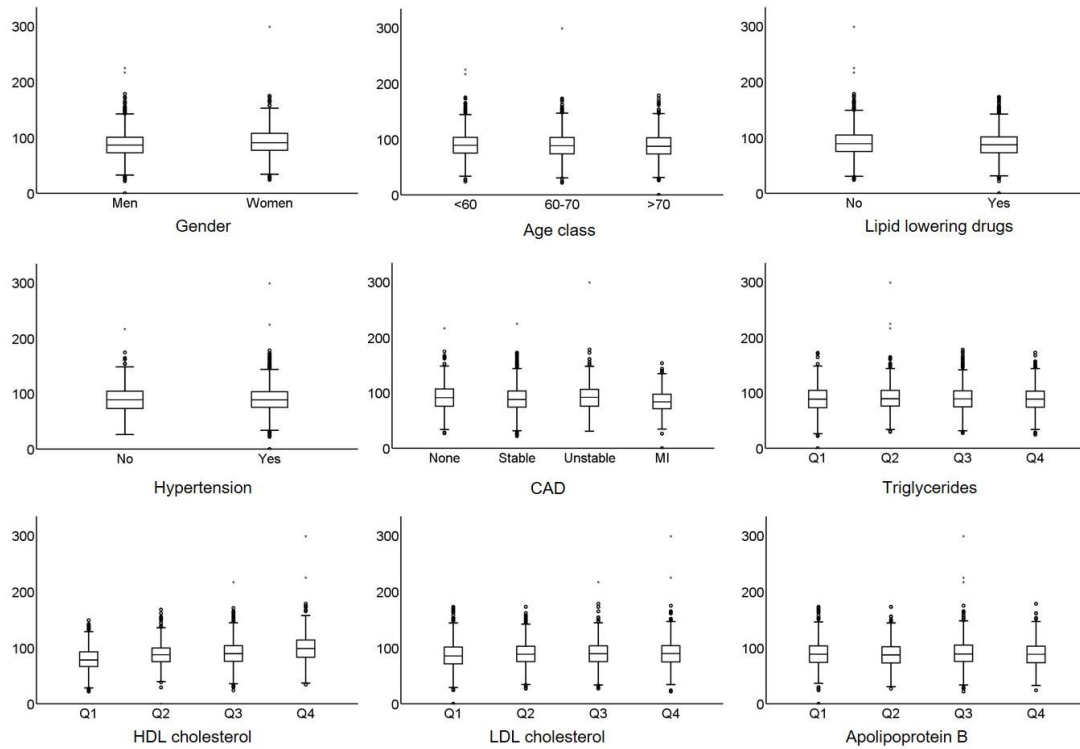

**Supplemental figure 4.** Box plots showing the distribution of cholesterol efflux capacity according to cardiovascular risk factors. Boxplots are displaying minimum, first quartile, median, third quartile, and maximum, as well as outliers.

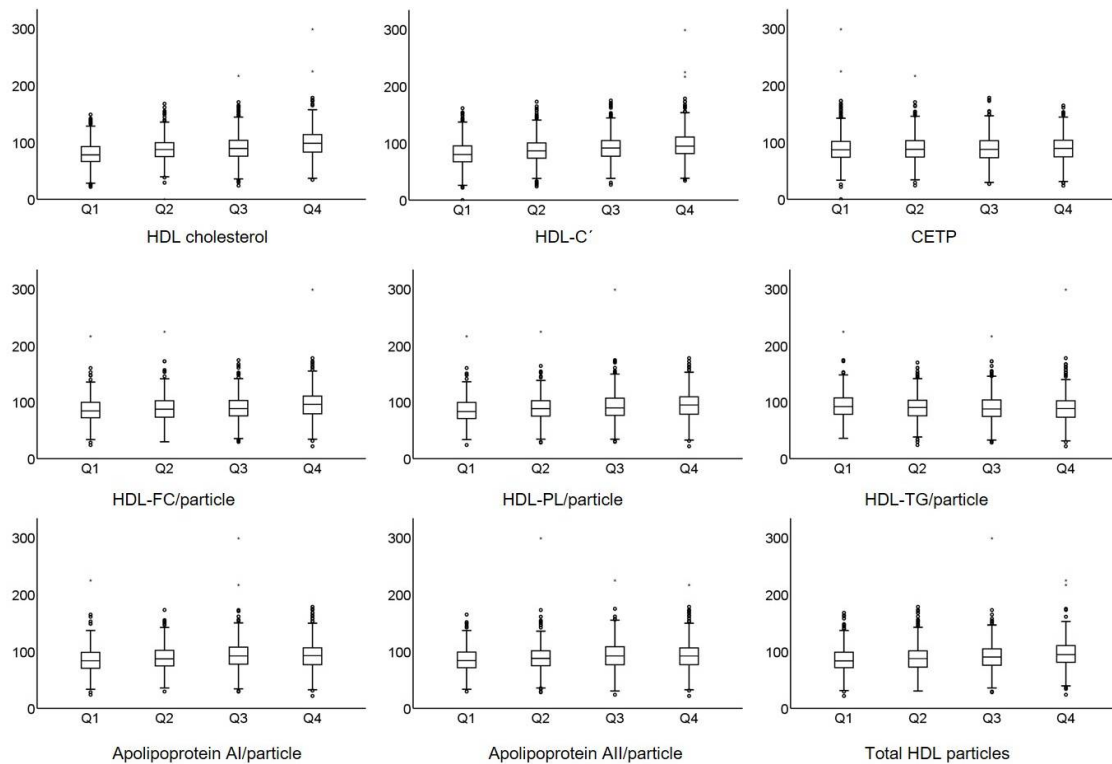

**Supplemental figure 5.** Box plots showing the distribution of cholesterol efflux capacity according to HDL parameters. Boxplots are displaying minimum, first quartile, median, third quartile, and maximum, as well as outliers.

**Supplementary Table 1.** Hazard ratio for cardiovascular death according to cholesterol efflux in 833 patients of the LURIC study without a history of an acute coronary event but with a high risk for CAD (pooled cohort equation > 7.5).

| <b>Efflux Quartile</b>  | <b>Model 1 HR (95% CI)</b> | <b>p</b> | <b>Model 2 HR (95% CI)</b> | <b>p</b> | <b>Model 3 HR (95% CI)</b> | <b>p</b> |
|-------------------------|----------------------------|----------|----------------------------|----------|----------------------------|----------|
| 1 <sup>st</sup> (n=188) | 1.0 <sup>reference</sup>   |          | 1.0 <sup>reference</sup>   |          | 1.0 <sup>reference</sup>   |          |
| 2 <sup>nd</sup> (n=216) | 0.521 (0.324-0.863)        | 0.007    | 0.522 (0.325-0.840)        | 0.007    | 0.481 (0.298-0.774)        | 0.003    |
| 3 <sup>rd</sup> (n=199) | 0.500 (0.304-0.822)        | 0.006    | 0.500 (0.304-0.823)        | 0.006    | 0.484 (0.294-0.799)        | 0.005    |
| 4 <sup>th</sup> (n=230) | 0.547 (0.346-0.866)        | 0.010    | 0.550 (0.345-0.878)        | 0.012    | 0.533 (0.333-0.852)        | 0.009    |
|                         | <b>Model 4 HR (95% CI)</b> | <b>p</b> | <b>Model 5 HR (95% CI)</b> | <b>p</b> | <b>Model 6 HR (95% CI)</b> | <b>p</b> |
| 1 <sup>st</sup> (n=188) | 1.0 <sup>reference</sup>   |          | 1.0 <sup>reference</sup>   |          | 1.0 <sup>reference</sup>   |          |
| 2 <sup>nd</sup> (n=216) | 0.514 (0.318-0.830)        | 0.006    | 0.537 (0.331-0.870)        | 0.012    | 0.558 (0.337-0.925)        | 0.024    |
| 3 <sup>rd</sup> (n=199) | 0.540 (0.326-0.897)        | 0.017    | 0.562 (0.337-0.935)        | 0.027    | 0.695 (0.412-1.174)        | 0.174    |
| 4 <sup>th</sup> (n=230) | 0.636 (0.405-1.086)        | 0.103    | 0.734 (0.443-1.217)        | 0.231    | 0.799 (0.476-1.342)        | 0.396    |

Model 1: not adjusted. Model 2: adjusted for age and gender. Model 3: adjusted for age, gender, use of statins, CAD, diabetes mellitus, smoking, triglycerides and LDL-cholesterol. Model 4: adjusted for age, gender, use of statins, CAD, diabetes mellitus, smoking, triglycerides, LDL-cholesterol and HDL-cholesterol. Model 5: adjusted for age, gender, use of statins, CAD, diabetes mellitus, smoking, triglycerides, LDL-cholesterol, HDL-cholesterol, apolipoprotein AI, apolipoprotein AII, HDL-C'. Model 6: adjusted for age, gender, use of statins, CAD, diabetes mellitus, smoking, triglycerides, LDL-cholesterol, HDL-cholesterol, adiponectin, fibrinogen, C-reactive protein. CI = confidence interval, HR = hazard ratio.
